# Supplementary material for: Metabolomics Signature of Plasma Renin Activity and Linkage with Blood Pressure Response to Beta Blockers and Thiazide Diuretics in Hypertensive European American Patients
Source: MDPI journal article supplement (doi:10.3390/metabo11090645), 2021-09-21
Supplement: s1 [file s1]

Data Supplement

# Metabolomics Signature of Plasma Renin Activity and Linkage with Blood Pressure Response to Beta Blockers and Thiazide Diuretics in Hypertensive European American Patients

Mai Mehanna<sup>1</sup>, Caitrin W McDonough<sup>1</sup>, Steven M Smith<sup>1</sup>, Yan Gong<sup>1</sup>, John G. Gums<sup>1</sup>, Arlene B. Chapman<sup>2</sup>, Julie A. Johnson<sup>1</sup>, Lauren McIntyre<sup>3</sup> and Rhonda M Cooper-DeHoff<sup>1</sup>

<sup>1</sup>Department of Pharmacotherapy and Translational Research and Center for Pharmacogenomics, College of Pharmacy, University of Florida, Gainesville, Florida

<sup>2</sup>Department of Medicine, University of Chicago, Chicago, Illinois

<sup>3</sup>Department of Molecular Genetics and Microbiology, College of Medicine, University of Florida, Gainesville, Florida

\* Correspondence: **Author:** Rhonda M. Cooper-DeHoff, PharmD, MS, Associate ProfessorDepartment of Pharmacotherapy and Translational ResearchColleges of Pharmacy and MedicineAssociate Director, Center for PharmacogenomicsUniversity of FloridaP.O. Box 100486Gainesville, FL 32610-0486Tel: (352) 273-6184Email: dehoff@cop.ufl.edu

**Running Head:** Metabolomics of PRA

**Key Words:** plasma renin activity; metabolomics; hypertension; blood pressure.

**Trials' Registry Numbers:** NCT01203852; NCT00246519

## Methods:

### *Study design and participants in detail:*

#### The Pharmacogenomics Evaluation of Antihypertensive Responses-2 (PEAR-2):

The primary analysis included PEAR-2 European American participants with baseline metabolomics data (discovery cohort). The PEAR-2 was a prospective, multicenter, open-label, sequential clinical trial, conducted at 3 sites (University of Florida in Gainesville, FL, Mayo Clinic in Rochester, MN, and Emory University in Atlanta, GA) (clinicaltrials.gov identifier: NCT01203852). Details on the PEAR-2 clinical trial have been previously published [1]. Study participants with uncomplicated mild to moderate essential hypertension (HTN), aged 18–65 years old, of any race were recruited. After an average washout period of 4 weeks of their current antihypertensive medications, participants were initially treated with the  $\beta$ -blocker metoprolol 50 mg twice daily for two weeks, followed by a dose titration to 100 mg twice daily for an additional six weeks. After a second washout period, the participants were treated with the thiazide-like diuretic chlorthalidone 15 mg once daily, followed by a dose titration to 25 mg once daily for a total of 6–8 weeks of treatment. Exclusion criteria were secondary HTN, systolic blood pressure (SBP) > 180 mmHg or diastolic BP (DBP) > 110 mmHg, isolated systolic HTN, cardiovascular disease, diabetes mellitus, heart rate < 55 beats/min, renal or hepatic dysfunction. Also, pregnant and lactating women were excluded.

#### PEAR:

We used data from European American participants who received monotherapy in PEAR in the replication analysis. The PEAR was a prospective, multicenter, randomized, open-label, crossover clinical trial, conducted at the same 3 centers mentioned above (clinicaltrials.gov identifier: NCT00246519). The details of this study have been previously reported [2]. Participants with uncomplicated mild to moderate essential HTN, aged 17–65 years old, of any race were enrolled. After a washout period of about 4 weeks of any antihypertensives, participants were randomized to either the  $\beta$ -blocker atenolol 50 mg once daily (dose titrated to 100 mg once daily if BP remained above 120/70 mmHg) or the thiazide diuretic hydrochlorothiazide (HCTZ) 12.5 mg once daily (dose titrated to 25 mg once daily if BP remained above 120/70 mmHg) for a total of 9 weeks. If the BP remained above the goal after monotherapy treatment, drug from the other treatment arm was added (i.e. HCTZ for those on atenolol, and vice versa), followed by the same dose titration for another 6 to 9 weeks of treatment. PEAR exclusion criteria were the same as described above for the PEAR-2 study.

#### Untargeted metabolomics profiling in detail:

Baseline fasting plasma samples from PEAR-2 and PEAR participants were used for the untargeted metabolomics profiling conducted by Metabolon [3]. Following receipt, samples were stored at  $-80^{\circ}\text{C}$  until processed. Samples were then prepared by removing proteins and recovering the metabolites using methanol under vigorous shaking, followed by centrifugation. The resulting extract was divided into five aliquots: two for analysis by two separate reverse phase (RP)/ultra-performance liquid chromatography – mass spectrometry (UPLC-MS)/MS methods with positive ion mode electrospray ionization (ESI), one for analysis by RP/UPLC-MS/MS with negative ion mode ESI, one for analysis by hydrophilic interaction liquid chromatography (HILIC)/UPLC-MS/MS with negative ion mode ESI, and one aliquot was reserved for backup. The sample extracts were stored overnight under nitrogen before preparation for analysis. Several types of controls were analyzed along with the experimental samples: a pooled matrix samples generated by taking a small volume of each experimental sample (or alternatively, use of a pool of well-characterized human plasma) served as a technical replicate, extracted water samples served as process blanks, and a cocktail of quality control (QC) standards that were carefully chosen not to interfere with the measurement of endogenous compounds were

spiked into each sample. Instrument variability was determined by calculating the median relative standard deviation (RSD) for the standards that were added to each sample before injection into the mass spectrometers. Overall process variability was determined by calculating the median RSD for all endogenous metabolites present in 100% of the pooled matrix samples. Samples were randomized across the platform run with QC samples placed evenly among the injections. All methods utilized a Waters ACQUITY UPLC and a Thermo Scientific Q-Exactive high resolution/ accurate mass spectrometer interfaced with a heated electrospray ionization (HESI-II) source and Orbitrap mass analyzer operated at 35,000 mass resolution. The sample extract was dried then reconstituted in solvents compatible to each of the four methods. One aliquot was analyzed using acidic positive ion conditions, chromatographically optimized for more hydrophilic compounds. In this method, the extract was gradient eluted from a C18 column (Water UPLC BEH C18-2.1x100 mm, 1.7  $\mu$ m) using water and methanol, containing 0.05% perfluoropentanoic acid (PFPA) and 0.1% formic acid (FA). Another aliquot was also analyzed using acidic positive ion conditions but was chromatographically optimized for more hydrophobic compounds. In this method, the extract was gradient eluted from the same afore mentioned C18 column using methanol, acetonitrile, water, 0.05% PFPA and 0.01% FA and was operated at an overall higher organic content. Another aliquot was analyzed using basic negative ion optimized conditions using a separate C18 column. The basic extracts were gradient eluted from the column using methanol and water, but with 6.5 mM Ammonium Bicarbonate at pH 8. The fourth aliquot was analyzed using negative ionization following elution from a HILIC column (Waters UPLC BEH Amide 2.1x150 mm, 1.7  $\mu$ m) using a gradient consisting of water and acetonitrile with 10 mM Ammonium Formate, pH 10.8. The scan range varied slightly between methods but covered 70-1000 *m/z*. Raw data files are archived, extracted, peak-identified and QC processed using Metabolon's hardware and software. Compounds were identified by comparison to library entries of purified standards or recurrent unknown entities. Metabolon maintains a library based on authenticated standards that contains the retention time/index (RI), mass to charge ration (*m/z*), and chromatographic data (including MS/MS spectral data) on all molecules present in the library. Also, biochemical identifications were based on three criteria: retention index within a narrow RI window of the proposed identification, accurate mass match to the library  $\pm$  10 ppm, and the MS/MS forward and reverse scores between the experimental data and authentic standards. The MS/MS scores are based on a comparison of the ions present in the experimental spectrum to the ions present in the library spectrum. While there may be similarities between these molecules based on one of these factors, the use of all three data points can be utilized to distinguish and differentiate biochemicals. More than 3300 commercially available purified standard compounds have been acquired and registered for determination of their analytical characteristics. Additional mass spectral entries have been created for structurally unnamed biochemicals, which have been identified by virtue of their recurrent nature (both chromatographic and mass spectral). The QC and curation processes were designed to ensure accurate and consistent identification of true chemical entities, and to remove those representing system artifacts, mis-assignments, and background noise. Library matches for each compound were checked for each sample and corrected if necessary. Peaks were quantified using area-under-the-curve. A data normalization step was performed to correct variation resulting from instrument inter-day tuning differences. Each compound was corrected in run-day blocks by registering the medians to equal one (1.00) and normalizing each data point proportionately.

#### QC on PEAR-2 metabolomics data:

A total of 1132 metabolites have been detected using Metabolon platform in PEAR-2 plasma samples. These metabolites included 761 known/ named biochemicals (295 lipids, 179 amino acids, 165 xenobiotics, 35 nucleotides, 28 cofactors and vitamins, 27 peptides, 23 carbohydrates and 9 energy metabolites) and 371 unknown/ unnamed biochemicals. MetaboAnalyst 3.0, an open-source R-based program for metabolomics and Galaxy

SECIM tools were used to perform data processing and QC on the PEAR-2 baseline metabolomics data [4,5]. These steps are described in detail below. The purpose of QC was to detect and flag any outlying metabolite or sample which need further investigation to assess whether these are true values or are due to any technical or experimental error.

#### Data processing:

After data processing, a total of 276 metabolites were removed. First, all the xenobiotics (n=165) were excluded from the analysis to reduce the environmental confounding effects on our analysis. These included drugs' metabolites (n=68), food or plant metabolites (n=39), metabolites involved in benzoate metabolism (n=19), chemicals (n=19), metabolites involved in xanthine metabolism (n=15), tobacco metabolites (n=4) and bacterial/fungal metabolite (n=1). Also, metabolites with a constant or single value across samples (n=13) were excluded since their effects on the outcome of interest may be ignored. Additionally, a total of 98 metabolites were also removed because they had greater than 60% of missing data. The final PEAR-2 dataset consisted of 856 metabolites (non-imputed data) which were included in the rest of the QC steps and in the analysis. Imputed dataset (imputation was done using the K-nearest neighbors (KNN) algorithm) was only used to conduct one of the QC steps (principal component analysis (PCA)).

#### PCA:

The first ten principal components (PCs) explain about 70% of the variability in the PEAR-2 metabolomics data (**Table S1**). Based on the first three PCs which explain a total of 35.8% of the variability, there was no separation among the PEAR-2 observations (n=379) included in this study. However, four outliers have been identified (**Figure S2**).

#### Standard Euclidean distance (SED):

SED is used to identify participants that are outliers based on their metabolic states using the pairwise SED between those participants. SED between each pair of participants (pairwise SEDs) and the SED between each participant and the estimated mean were calculated. Based on the SED values, 11 participants had outlying metabolic states (having the largest SED values) compared to the rest. Further investigation of those participants demonstrated that 5 of them had greater than 10% missing metabolomics data (the average missing was 8.6%). Also, 3 of those 5 participants had outlying/ extreme (greater than 3 standard deviations (SDs)) lipid (triglycerides, LDL and HDL) values as shown in **Table S2**.

#### Bland-Altman (BA):

BA assesses the concordance of the metabolomics data between pairs of participants, particularly those within specified groups [6]. A linear regression fit is generated between the values to identify/ flag any outlying values. To conduct this QC step, the PEAR-2 dataset was categorized into eight different groups: male participants aged < 50 years old with body mass index (BMI) < 30 kg/m<sup>2</sup> (n=39), male participants aged < 50 years old with BMI ≥ 30 kg/m<sup>2</sup> (n=44), male participants aged ≥ 50 years old with BMI < 30 kg/m<sup>2</sup> (n=74), male participants aged ≥ 50 years old with BMI ≥ 30 kg/m<sup>2</sup> (n=56), female participants aged < 50 years old with BMI < 30 kg/m<sup>2</sup> (n=50), female participants aged < 50 years old with BMI ≥ 30 kg/m<sup>2</sup> (n=49), female participants aged ≥ 50 years old with BMI < 30 kg/m<sup>2</sup> (n=26) and female participants aged ≥ 50 years old with BMI ≥ 30 kg/m<sup>2</sup> (n=41). Participant was flagged if greater than 20% of the metabolites' values for this participant were also flagged as outliers (participants within the same group are expected to have similar metabolites' values). Metabolite was flagged if greater than 5% of the participants' values for this metabolite were also flagged as outliers. The measures used to determine the outlying values were Pearson residuals, DFFITS and Cooks D. Based on these measures and on the BA plots, no participants were flagged, whereas 23 metabolites were flagged (**Table S3**).

**Coefficient of variation (CV):**

CV assesses the consistency of the metabolomics data across participants and is calculated by dividing the SD by the mean for each metabolite. The higher the metabolite's CV value, the higher is the variability of that metabolite across participants. The top 10% of the metabolites with the largest CV values (exceeding the CV cutoff of 0.823,  $n=37$ ) were flagged (Table S4).

**Figure S1.** Consort diagram showing the participants included in this study.

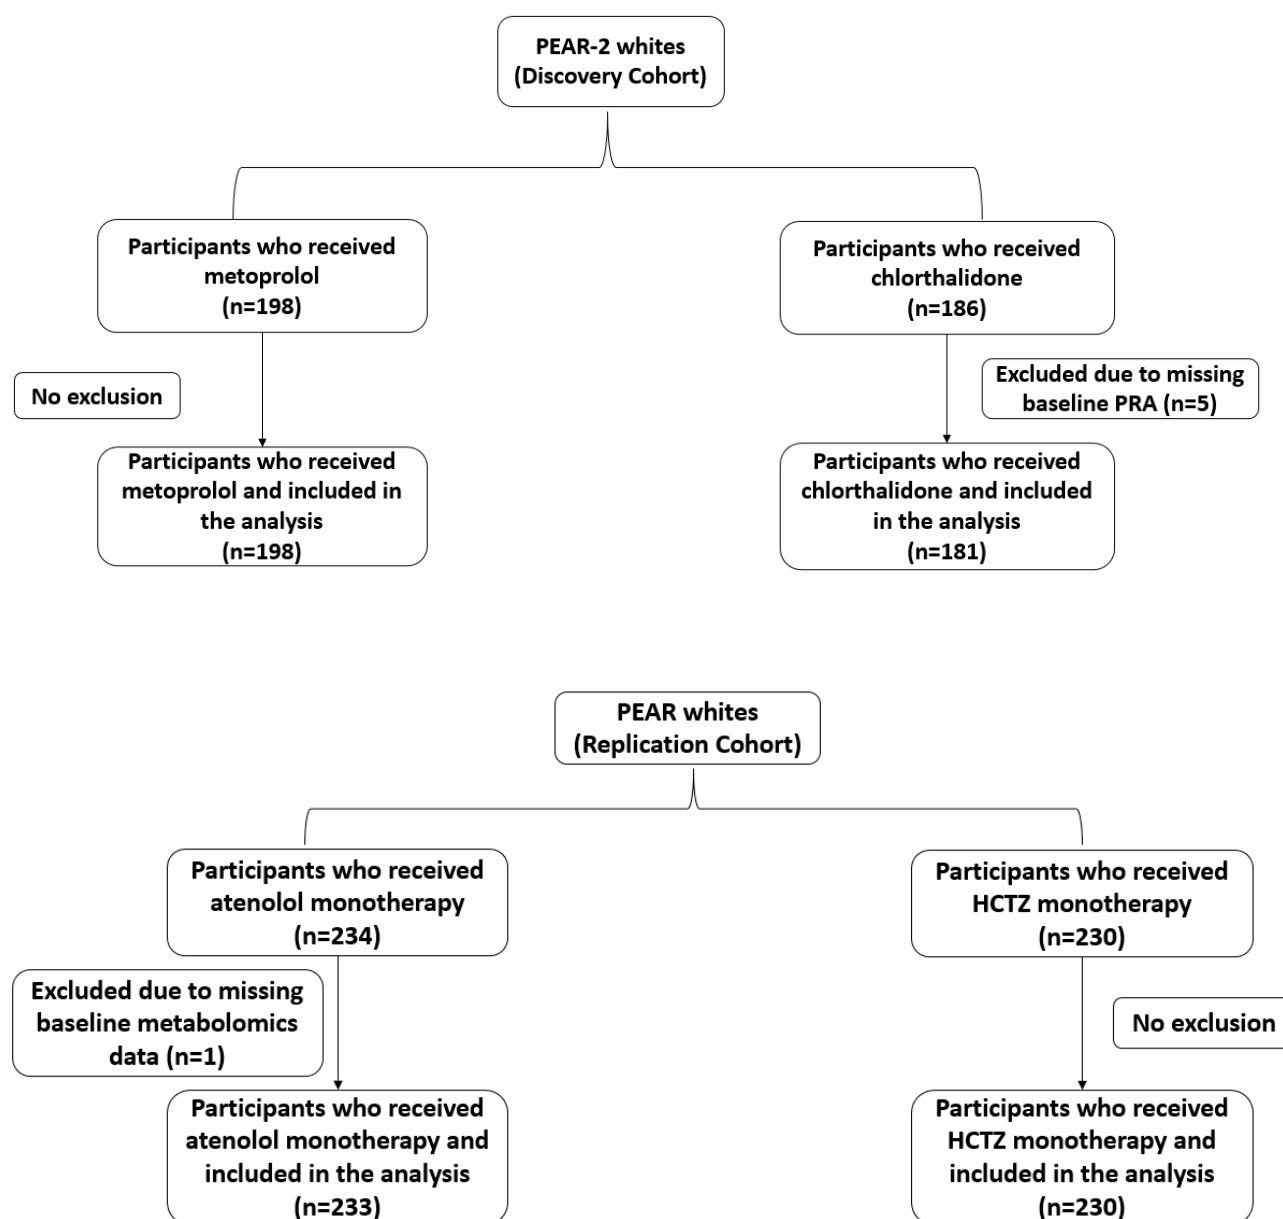

**Figure S1.** Consort diagram showing the participants included in this study. Abbreviations: PEAR, Pharmacogenomic Evaluation of Antihypertensive Responses; HCTZ, hydrochlorothiazide.

**Figure S2.** PCA scatter plots showing clustering of the PEAR-2 samples (n=379) based on the first three PCs.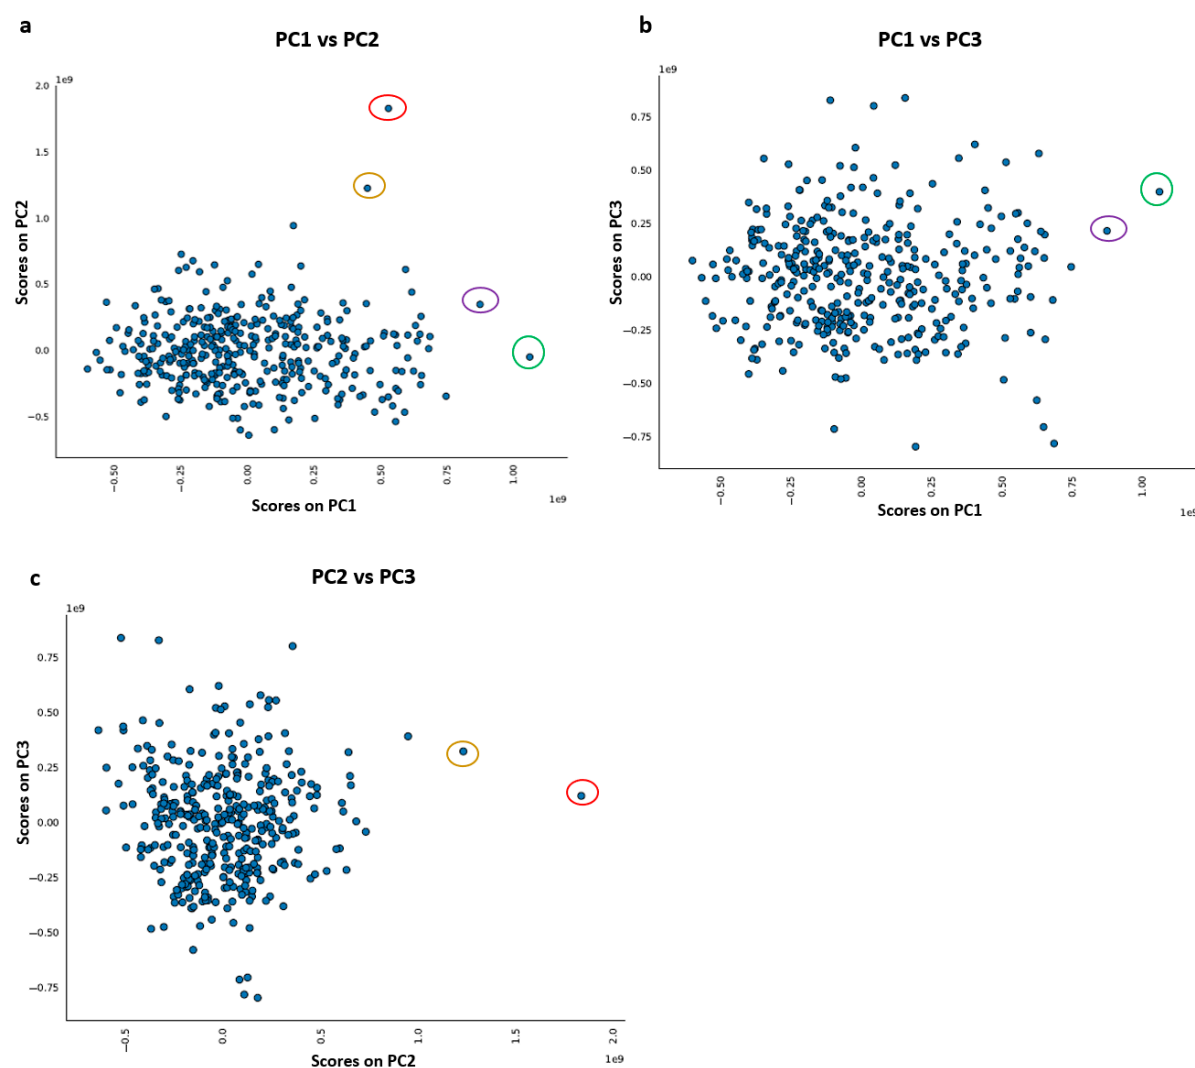**Figure S2.** PCA scatter plots showing clustering of the PEAR-2 samples (n=379) based on a) PC1 vs. PC2, b) PC1 vs. PC3 and c) PC2 vs. PC3. PC1, PC2 and PC3 explain 13.8%, 12.2% and 9.8% of the variability in the metabolomics data, respectively. The scatterplots show four outliers (in red, brown, purple and green circles). Abbreviations: PCA, principal component analysis; PEAR, Pharmacogenomic Evaluation of Antihypertensive Responses; PC, principal component.**Table S1.** Percent of variability in metabolomics data explained by each one of the first 10 PCs.

| PC   | % of variability explained |
|------|----------------------------|
| PC1  | 13.8%                      |
| PC2  | 12.2%                      |
| PC3  | 9.8%                       |
| PC4  | 7.5%                       |
| PC5  | 5.4%                       |
| PC6  | 5.2%                       |
| PC7  | 4.3%                       |
| PC8  | 3.9%                       |
| PC9  | 3.2%                       |
| PC10 | 2.9%                       |

Abbreviation: PC, principal component.

**Table S2.** The 11 PEAR-2 participants with the largest SEDs.

| Samples        | Mean SED | % Missing Metabolites | Triglycerides Z-scores | LDL Z-scores | HDL Z-scores |
|----------------|----------|-----------------------|------------------------|--------------|--------------|
| Participant 1  | 54.8     | 12.9*                 | −0.7                   | −0.1         | 4**          |
| Participant 2  | 48.7     | 6.4                   | −0.3                   | 1.1          | −1.2         |
| Participant 3  | 41.2     | 7.6                   | −0.5                   | −0.02        | 1.8          |
| Participant 4  | 35.1     | 4.6                   | −0.2                   | 1.6          | −0.5         |
| Participant 5  | 33.7     | 3.2                   | −0.4                   | −1.1         | −0.4         |
| Participant 6  | 33.1     | 11.2*                 | 3.4**                  | −3.8**       | −2.2         |
| Participant 7  | 32       | 11.4*                 | 9.4**                  | −2.6         | −2.1         |
| Participant 8  | 31.7     | 9.3                   | 0.6                    | −0.5         | 0.3          |
| Participant 9  | 30.3     | 18.7*                 | −0.7                   | −0.4         | 2.5          |
| Participant 10 | 29.7     | 10.4*                 | 0.3                    | 1.2          | 0.3          |
| Participant 11 | 28.9     | 7.7                   | −0.5                   | 0.7          | −0.7         |

\*These samples had > 10% missing metabolomics data.

\*\*Participants with these samples had outlying/ extreme (>3 SDs) lipid values.

Abbreviations: PEAR, Pharmacogenomic Evaluation of Antihypertensive Responses; SED, standard Euclidean distance; LDL, low density lipoprotein; HDL, high density lipoprotein; SD, standard deviation.

**Table S3.** The 23 metabolites flagged by BA plots and measures.

| Metabolite                                        | Classification*        | Pathway                                     |
|---------------------------------------------------|------------------------|---------------------------------------------|
| Acetylcarnitine                                   | Lipid                  | Fatty Acid Metabolism (Acyl Carnitine)      |
| Alanine                                           | Amino Acid             | Alanine and Aspartate Metabolism            |
| Arachidonate (20:4n6)                             | Lipid                  | Polyunsaturated Fatty Acid (n3 and n6)      |
| Arginine                                          | Amino Acid             | Urea cycle; Arginine and Proline Metabolism |
| Betaine                                           | Amino Acid             | Glycine, Serine and Threonine Metabolism    |
| Creatine                                          | Amino Acid             | Creatine Metabolism                         |
| Creatinine                                        | Amino Acid             | Creatine Metabolism                         |
| Glycerophosphorylcholine (GPC)                    | Lipid                  | Phospholipid Metabolism                     |
| Histidine                                         | Amino Acid             | Histidine Metabolism                        |
| 1-Oleoyl-2-linoleoyl-GPI (18:1/18:2)*             | Lipid                  | Phospholipid Metabolism                     |
| Lactosyl-N-palmitoyl-sphingosine                  | Lipid                  | Sphingolipid Metabolism                     |
| Linoleoyl ethanolamide                            | Lipid                  | Endocannabinoid                             |
| Lysine                                            | Amino Acid             | Lysine Metabolism                           |
| 1-Oleoyl-GPE (18:1)                               | Lipid                  | Lysolipid                                   |
| Myristate (14:0)                                  | Lipid                  | Long Chain Fatty Acid                       |
| 1-Palmitoleoylglycerol (16:1)*                    | Lipid                  | Monoacylglycerol                            |
| 1-Palmitoyl-2-gamma-linolenoyl-GPC (16:0/18:3n6)* | Lipid                  | Phospholipid Metabolism                     |
| Palmitate (16:0)                                  | Lipid                  | Long Chain Fatty Acid                       |
| Phenylalanine                                     | Amino Acid             | Phenylalanine and Tyrosine Metabolism       |
| Threonine                                         | Amino Acid             | Glycine, Serine and Threonine Metabolism    |
| Trigonelline (N'-methylnicotinate)                | Cofactors and Vitamins | Nicotinate and Nicotinamide Metabolism      |
| Urea                                              | Amino Acid             | Urea cycle; Arginine and Proline Metabolism |
| 1-Palmitoylglycerol (16:0)                        | Lipid                  | Monoacylglycerol                            |

\*Metabolites were classified based on the human metabolome database superclass classification <http://www.hmdb.ca/classification>. Abbreviations: BA, Bland-Altman.

**Table S4.** The top 10% of the metabolites with the largest CV values (n=37).

| Metabolite                                                                                                               | Classification*        | Pathway                                              |
|--------------------------------------------------------------------------------------------------------------------------|------------------------|------------------------------------------------------|
| N-Carbamoylalanine                                                                                                       | Amino Acid             | Alanine and Aspartate Metabolism                     |
| Oleoylethanolamide                                                                                                       | Lipid                  | Endocannabinoid                                      |
| Phenol sulfate                                                                                                           | Amino Acid             | Tyrosine Metabolism                                  |
| Pregnen-diol disulfate*                                                                                                  | Lipid                  | Pregnenolone Steroids                                |
| Pyridoxate                                                                                                               | Cofactors and Vitamins | Vitamin B6 Metabolism                                |
| Sphingosine                                                                                                              | Lipid                  | Sphingosines                                         |
| Trigonelline (N'-methylnicotinate)                                                                                       | Cofactors and Vitamins | Nicotinate and Nicotinamide Metabolism               |
| Tryptophan betaine                                                                                                       | Amino Acid             | Tryptophan Metabolism                                |
| cis-3,4-methyleneheptanoyl carnitine sulfate of piperine metabolite C <sub>16</sub> H <sub>19</sub> NO <sub>3</sub> (2)* | NA                     | NA                                                   |
| X – 11470                                                                                                                | NA                     | NA                                                   |
| X – 11478                                                                                                                | NA                     | NA                                                   |
| 4-allylcatechol sulfate                                                                                                  | NA                     | NA                                                   |
| X – 12462                                                                                                                | NA                     | NA                                                   |
| X – 12543                                                                                                                | NA                     | NA                                                   |
| 1-Stearoyl-GPC (18:0)                                                                                                    | NA                     | NA                                                   |
| X – 15245                                                                                                                | NA                     | NA                                                   |
| X – 21310                                                                                                                | NA                     | NA                                                   |
| indoleacetylcarnitine*                                                                                                   | NA                     | NA                                                   |
| X – 23680                                                                                                                | NA                     | NA                                                   |
| 3-Hydroxy-5-cholestenoic acid                                                                                            | Lipid                  | Sterol                                               |
| 3-Methylglutaryl carnitine (2)                                                                                           | Amino Acid             | Lysine Metabolism                                    |
| 3-Phenylpropionate (hydrocinnamate)                                                                                      | Amino Acid             | Phenylalanine and Tyrosine Metabolism                |
| 3b-Hydroxy-5-choleonoic acid                                                                                             | Lipid                  | Secondary Bile Acid Metabolism                       |
| 4-Androsten-3beta,17beta-diol disulfate (1)                                                                              | Lipid                  | Steroid                                              |
| 4-Androsten-3beta,17beta-diol monosulfate (1)                                                                            | Lipid                  | Steroid                                              |
| 5-HETE                                                                                                                   | Lipid                  | Eicosanoid                                           |
| 5Alpha-androstan-3alpha,17alpha-diol monosulfate                                                                         | Lipid                  | Steroid                                              |
| 1-Linoleoyl-2-linolenoyl-GPC (18:2/18:3)*                                                                                | Lipid                  | Phospholipid Metabolism                              |
| Decanoylcarnitine                                                                                                        | Lipid                  | Fatty Acid Metabolism (Acyl Carnitine)               |
| Glycochenodeoxycholate                                                                                                   | Lipid                  | Primary Bile Acid Metabolism                         |
| Glycolithocholate sulfate*                                                                                               | Lipid                  | Secondary Bile Acid Metabolism                       |
| Glycoursodeoxycholate                                                                                                    | Lipid                  | Secondary Bile Acid Metabolism                       |
| Hexanoylcarnitine                                                                                                        | Lipid                  | Fatty Acid Metabolism (Acyl Carnitine)               |
| Inosine 5'-monophosphate (IMP)                                                                                           | Nucleotide             | Purine Metabolism, (Hypo)Xanthine/Inosine containing |
| Mannitol/sorbitol                                                                                                        | Carbohydrate           | Fructose, Mannose and Galactose Metabolism           |
| N-Acetyltaurine                                                                                                          | Amino Acid             | Methionine, Cysteine, SAM and Taurine Metabolism     |



\*Metabolites were classified based on the human metabolome database superclass classification <http://www.hmdb.ca/classification>. Abbreviations: CV, coefficient of variation; NA, not applicable.

**Table S5.** The 48 metabolites nominally associated with the baseline Log PRA in PEAR-2 European Americans with  $P < 0.01$ .

| Metabolite                                          | Classification         | Pathway                                   | HMDB                      | Estimate $\pm$ SE | P-value |
|-----------------------------------------------------|------------------------|-------------------------------------------|---------------------------|-------------------|---------|
| N-acetylcarnosine                                   | Peptide                | Dipeptide Derivative                      | <a href="#">HMDB12881</a> | $0.27 \pm 0.08$   | 0.001   |
| Gamma-glutamylglutamine                             | Peptide                | Gamma-glutamyl Amino Acid                 | <a href="#">HMDB11738</a> | $-0.08 \pm 0.03$  | 0.007   |
| Malate                                              | Energy Metabolite      | TCA Cycle                                 | <a href="#">HMDB00156</a> | $0.24 \pm 0.07$   | 0.001   |
| Succinylcarnitine                                   | Energy Metabolite      | TCA Cycle                                 | NA                        | $-0.16 \pm 0.06$  | 0.0064  |
| 1-(1-enyl-palmitoyl)-2-linoleoyl-GPE (P-16:0/18:2)* | Lipid                  | Plasmalogen                               | NA                        | $0.05 \pm 0.02$   | 0.001   |
| 1-(1-enyl-palmitoyl)-2-oleoyl-GPC (P-16:0/18:1)*    | Lipid                  | Plasmalogen                               | NA                        | $0.07 \pm 0.02$   | 0.003   |
| Cortisol                                            | Lipid                  | Steroid                                   | <a href="#">HMDB00063</a> | $0.12 \pm 0.04$   | 0.001   |
| Cortisone                                           | Lipid                  | Steroid                                   | <a href="#">HMDB02802</a> | $0.14 \pm 0.05$   | 0.0075  |
| 5Alpha-androstan-3alpha,17alpha-diol monosulfate    | Lipid                  | Steroid                                   | NA                        | $0.1 \pm 0.04$    | 0.0087  |
| Myristoylcarnitine                                  | Lipid                  | Fatty Acid Metabolism (Acyl Carnitine)    | <a href="#">HMDB05066</a> | $0.15 \pm 0.05$   | 0.002   |
| Decanoylcarnitine                                   | Lipid                  | Fatty Acid Metabolism (Acyl Carnitine)    | <a href="#">HMDB00651</a> | $0.08 \pm 0.03$   | 0.0044  |
| Suberoylcarnitine                                   | Lipid                  | Fatty Acid Metabolism (Acyl Carnitine)    | NA                        | $0.09 \pm 0.03$   | 0.007   |
| 3-Hydroxybutyrylcarnitine (1)                       | Lipid                  | Fatty Acid Metabolism (Acyl Carnitine)    | <a href="#">HMDB13127</a> | $0.09 \pm 0.03$   | 0.0087  |
| Palmitoylcarnitine                                  | Lipid                  | Fatty Acid Metabolism (Acyl Carnitine)    | <a href="#">HMDB00222</a> | $0.15 \pm 0.06$   | 0.0099  |
| 1-Palmitoyl-2-oleoyl-GPI (16:0/18:1)*               | Lipid                  | Phospholipid Metabolism                   | NA                        | $0.13 \pm 0.04$   | 0.0028  |
| 1-Palmitoyl-2-palmitoleoyl-GPC (16:0/16:1)*         | Lipid                  | Phospholipid Metabolism                   | NA                        | $0.15 \pm 0.05$   | 0.003   |
| 1-Stearoyl-2-oleoyl-GPE (18:0/18:1)                 | Lipid                  | Phospholipid Metabolism                   | NA                        | $0.13 \pm 0.05$   | 0.0068  |
| 1-palmitoleoyl-GPC (16:1)*                          | Lipid                  | Lysolipid                                 | <a href="#">HMDB10383</a> | $0.1 \pm 0.03$    | 0.002   |
| 1-Palmitoyl-GPE (16:0)                              | Lipid                  | Lysolipid                                 | <a href="#">HMDB11503</a> | $0.17 \pm 0.06$   | 0.005   |
| 1-Arachidonoyl-GPC (20:4n6)*                        | Lipid                  | Lysolipid                                 | <a href="#">HMDB10395</a> | $-0.19 \pm 0.07$  | 0.004   |
| 1-Oleoyl-GPE (18:1)                                 | Lipid                  | Lysolipid                                 | <a href="#">HMDB11506</a> | $0.34 \pm 0.12$   | 0.0068  |
| 10-Heptadecenoate (17:1n7)                          | Lipid                  | Long Chain Fatty Acid                     | <a href="#">HMDB60038</a> | $-0.09 \pm 0.03$  | 0.003   |
| Glycerol                                            | Lipid                  | Glycerolipid Metabolism                   | <a href="#">HMDB00131</a> | $0.11 \pm 0.04$   | 0.0072  |
| 1-Palmitoleoylglycerol (16:1)*                      | Lipid                  | Monoacylglycerol                          | NA                        | $0.21 \pm 0.08$   | 0.0087  |
| Maleate                                             | Lipid                  | Fatty Acid, Dicarboxylate                 | <a href="#">HMDB00176</a> | $0.08 \pm 0.03$   | 0.009   |
| 3-Hydroxydecanoate                                  | Lipid                  | Fatty Acid, Monohydroxy                   | <a href="#">HMDB02203</a> | $0.11 \pm 0.04$   | 0.0078  |
| Cysteinylglycine                                    | Amino Acid             | Glutathione Metabolism                    | <a href="#">HMDB00078</a> | $0.09 \pm 0.03$   | 0.002   |
| Phenylacetylglutamate                               | Amino Acid             | Phenylalanine and Tyrosine Metabolism     | <a href="#">HMDB59772</a> | $0.08 \pm 0.03$   | 0.003   |
| N-acetyltyrosine                                    | Amino Acid             | Phenylalanine and Tyrosine Metabolism     | <a href="#">HMDB00866</a> | $0.12 \pm 0.04$   | 0.0057  |
| Gentisate                                           | Amino Acid             | Phenylalanine and Tyrosine Metabolism     | <a href="#">HMDB00152</a> | $0.06 \pm 0.02$   | 0.0083  |
| Imidazole propionate                                | Amino Acid             | Histidine Metabolism                      | <a href="#">HMDB02271</a> | $0.15 \pm 0.05$   | 0.0054  |
| Lysine                                              | Amino Acid             | Lysine Metabolism                         | <a href="#">HMDB00182</a> | $-0.33 \pm 0.11$  | 0.0058  |
| Leucine                                             | Amino Acid             | Leucine, Isoleucine and Valine Metabolism | <a href="#">HMDB00687</a> | $0.1 \pm 0.03$    | 0.006   |
| N-acetylvaline                                      | Amino Acid             | Leucine, Isoleucine and Valine Metabolism | <a href="#">HMDB11757</a> | $0.16 \pm 0.06$   | 0.0098  |
| 4-Guanidinobutanoate                                | Amino Acid             | Guanidino and Acetamido Metabolism        | <a href="#">HMDB03464</a> | $0.08 \pm 0.03$   | 0.0075  |
| Pantothenate                                        | Cofactors and Vitamins | Pantothenate and CoA Metabolism           | <a href="#">HMDB00210</a> | $-0.06 \pm 0.02$  | 0.0068  |
| Linoleoyl-arachidonoyl-glycerol (18:2/20:4) [2]     | unknown                | unknown                                   | NA                        | $0.13 \pm 0.04$   | 0.002   |
| 2,3-Dihydroxy-5-methylthio-4-pentenoate (DMTPA)     | unknown                | unknown                                   | NA                        | $-0.07 \pm 0.02$  | 0.002   |
| 4-Hydroxyphenylacetylglutamine                      | unknown                | unknown                                   | NA                        | $0.09 \pm 0.04$   | 0.0099  |
| X – 15503                                           | unknown                | unknown                                   | NA                        | $0.11 \pm 0.03$   | 0.002   |
| X – 12851                                           | unknown                | unknown                                   | NA                        | $0.12 \pm 0.04$   | 0.002   |
| X – 14056                                           | unknown                | unknown                                   | NA                        | $0.06 \pm 0.02$   | 0.0025  |
| X – 24309                                           | unknown                | unknown                                   | NA                        | $0.03 \pm 0.01$   | 0.004   |
| X – 21815                                           | unknown                | unknown                                   | NA                        | $0.08 \pm 0.03$   | 0.004   |
| X – 17654                                           | unknown                | unknown                                   | NA                        | $0.12 \pm 0.04$   | 0.0047  |
| X – 21607                                           | unknown                | unknown                                   | NA                        | $-0.08 \pm 0.03$  | 0.0056  |
| X – 17354                                           | unknown                | unknown                                   | NA                        | $0.09 \pm 0.03$   | 0.0073  |

|                  |         |         |    |             |        |
|------------------|---------|---------|----|-------------|--------|
| <b>X – 23780</b> | unknown | unknown | NA | 0.07 ± 0.03 | 0.0083 |
|------------------|---------|---------|----|-------------|--------|

P-values were produced using linear regression analysis of each metabolite with the baseline log-transformed plasma renin activity (PRA) in PEAR 2 European Americans, with adjustment of age, sex and baseline systolic blood pressure (SBP). Abbreviations: PRA, plasma renin activity; PEAR, Pharmacogenomic Evaluation of Antihypertensive Responses; SE, standard error; NA, not applicable; TCA, tricarboxylic acid cycle; HMDB, Human Metabolome Database.

**Table S6.** Availability of the metabolites having significant or nominally significant associations with the baseline PRA from discovery phase (n=63) in PEAR.

| <b>Significant or Nominally Significant Metabolites in PEAR-2</b> | <b>Availability in PEAR</b> |
|-------------------------------------------------------------------|-----------------------------|
| <b>Sphinganine-1-phosphate</b>                                    | Present                     |
| <b>Sphingomyelin (d18:1/20:1, d18:2/20:0)</b>                     | Present                     |
| <b>Sphingosine-1-phosphate</b>                                    | Present                     |
| <b>1-(1-enyl-palmitoyl)-2-linoleoyl-GPE (P-16:0/18:2)*</b>        | Present                     |
| <b>1-Palmitoyl-2-oleoyl-GPI (16:0/18:1)*</b>                      | Present                     |
| <b>1-(1-enyl-palmitoyl)-2-oleoyl-GPC (P-16:0/18:1)*</b>           | Present                     |
| <b>1-Palmitoyl-2-palmitoleoyl-GPC (16:0/16:1)*</b>                | Present                     |
| <b>1-Palmitoleoyl-GPC (16:1)*</b>                                 | Present                     |
| <b>1-Arachidonoyl-GPC (20:4n6)*</b>                               | Present                     |
| <b>1-Palmitoyl-GPE (16:0)</b>                                     | Present                     |
| <b>1-Oleoyl-GPE (18:1)</b>                                        | Present                     |
| <b>1-Stearoyl-2-oleoyl-GPE (18:0/18:1)</b>                        | Present                     |
| <b>Cortisol</b>                                                   | Present                     |
| <b>Cortisone</b>                                                  | Present                     |
| <b>5Alpha-androstan-3alpha,17alpha-diol monosulfate</b>           | Present                     |
| <b>3-Hydroxybutyrylcarnitine (1)</b>                              | Present                     |
| <b>10-Heptadecenoate (17:1n7)</b>                                 | Present                     |
| <b>Glycerol</b>                                                   | Present                     |
| <b>1-Palmitoleoylglycerol (16:1)*</b>                             | Present                     |
| <b>Maleate</b>                                                    | Present                     |
| <b>Caprate (10:0)</b>                                             | Present                     |
| <b>3-Hydroxydecanoate</b>                                         | Present                     |
| <b>Cysteinylglycine</b>                                           | Present                     |
| <b>N-acetyltyrosine</b>                                           | Present                     |
| <b>Gentisate</b>                                                  | Present                     |
| <b>Imidazole propionate</b>                                       | Present                     |
| <b>Lysine</b>                                                     | Present                     |
| <b>Leucine</b>                                                    | Present                     |
| <b>N-acetylvaline</b>                                             | Present                     |
| <b>N-acetylglutamate</b>                                          | Present                     |
| <b>Beta-hydroxyisovalerate</b>                                    | Present                     |
| <b>Threonine</b>                                                  | Present                     |
| <b>4-Guanidinobutanoate</b>                                       | Present                     |
| <b>Pantothenate</b>                                               | Present                     |
| <b>Fumarate</b>                                                   | Present                     |
| <b>Malate</b>                                                     | Present                     |
| <b>N-acetylcarnosine</b>                                          | Present                     |
| <b>Gamma-glutamylglutamine</b>                                    | Present                     |
| <b>2,3-Dihydroxy-5-methylthio-4-pentenoate (DMTPA)</b>            | Present                     |
| <b>X – 15503</b>                                                  | Present                     |
| <b>X – 12851</b>                                                  | Present                     |
| <b>X – 14056</b>                                                  | Present                     |
| <b>X – 24309</b>                                                  | Present                     |
| <b>X – 21815</b>                                                  | Present                     |
| <b>X – 17654</b>                                                  | Present                     |

|                                                 |         |
|-------------------------------------------------|---------|
| X – 21607                                       | Present |
| X – 23780                                       | Present |
| Sphinganine                                     | Absent  |
| Palmitoylcarnitine                              | Absent  |
| Myristoylcarnitine                              | Absent  |
| Decanoylcarnitine                               | Absent  |
| Succinylcarnitine                               | Absent  |
| Suberoylcarnitine                               | Absent  |
| Phenylacetylglutamate                           | Absent  |
| 4-Hydroxyphenylacetylglutamine                  | Absent  |
| 3-Hydroxybutyrylglycine                         | Absent  |
| 3-Hydroxystachydrine                            | Absent  |
| 1-Methyl-5-imidazoleacetate                     | Absent  |
| Glucuronide of C10H18O2 (7)                     | Absent  |
| Linoleoyl-arachidonoyl-glycerol (18:2/20:4) [2] | Absent  |
| X – 12726                                       | Absent  |
| X – 12818                                       | Absent  |
| X – 17354                                       | Absent  |

Abbreviations: PRA, plasma renin activity; PEAR, Pharmacogenomic Evaluation of Antihypertensive Responses.

**Table S7.** The metabolites clustered with caprate, sphingosine-1-phosphate and 1-palmitoleoyl-GPC (16:1)\*.

|                         | Clustered Metabolite Name                              | Classification         | Pathway                                   | Degree      |
|-------------------------|--------------------------------------------------------|------------------------|-------------------------------------------|-------------|
| Caprate                 | 1-(1-enyl-palmitoyl)-2-oleoyl-GPC (P-16:0/18:1)*       | Lipid                  | Plasmalogen                               | 0.431155443 |
|                         | 1-(1-enyl-palmitoyl)-2-linoleoyl-GPE (P-16:0/18:2)*    | Lipid                  | Plasmalogen                               | 0.43073798  |
|                         | 1-(1-enyl-palmitoyl)-2-palmitoleoyl-GPC (P-16:0/16:1)* | Lipid                  | Plasmalogen                               | 0.413949423 |
|                         | 1-linoleoylglycerol (18:2)                             | Lipid                  | Monoacylglycerol                          | 0.428059948 |
|                         | 1-linoleoyl-GPA (18:2)*                                | Lipid                  | Lysolipid                                 | 0.420636403 |
|                         | 3-hydroxyhexanoate                                     | Lipid                  | Fatty Acid, Monohydroxy                   | 0.228050454 |
|                         | p-cresol sulfate                                       | Amino Acid             | Phenylalanine and Tyrosine Metabolism     | 0.417169248 |
|                         | Methylsuccinate                                        | Amino Acid             | Leucine, Isoleucine and Valine Metabolism | 0.224595138 |
|                         | methylsuccinoylcarnitine (1)                           | Amino Acid             | Leucine, Isoleucine and Valine Metabolism | 0.186115211 |
|                         | alpha-CEHC sulfate                                     | Cofactors and Vitamins | Tocopherol Metabolism                     | 0.156961604 |
|                         | Glucuronate                                            | Carbohydrate           | Aminosugar Metabolism                     | 0.198347442 |
|                         | X – 12824                                              | unknown                | Unknown                                   | 0.248259443 |
|                         | X – 22475                                              | unknown                | Unknown                                   | 0.216592745 |
|                         | X – 24551                                              | unknown                | Unknown                                   | 0.179023517 |
|                         | X – 12729                                              | unknown                | Unknown                                   | 0.166716922 |
|                         | X – 22764                                              | unknown                | Unknown                                   | 0.147428036 |
|                         | X – 13431                                              | unknown                | Unknown                                   | 0.096858956 |
| Sphingosine-1-phosphate | Clustered Metabolite Name                              | Classification         | Pathway                                   | Degree      |
|                         | Sphinganine                                            | Lipid                  | Sphingolipid Metabolism                   | 0.368056837 |
|                         | Sphingosine                                            | Lipid                  | Sphingolipid Metabolism                   | 0.354593032 |
|                         | sphinganine-1-phosphate                                | Lipid                  | Sphingolipid Metabolism                   | 0.135935101 |
|                         | 1-palmitoyl-2-stearoyl-GPC (16:0/18:0)                 | Lipid                  | Phospholipid Metabolism                   | 0.302372322 |
|                         | 1-stearoyl-2-linoleoyl-GPI (18:0/18:2)                 | Lipid                  | Phospholipid Metabolism                   | 0.221130745 |

|                            |                                                     |                       |                                                      |               |
|----------------------------|-----------------------------------------------------|-----------------------|------------------------------------------------------|---------------|
| 1-Palmitoleoyl-GPC (16:1)* | Phosphoethanolamine                                 | Lipid                 | Phospholipid Metabolism                              | 0.282640297   |
|                            | choline phosphate                                   | Lipid                 | Phospholipid Metabolism                              | 0.203683279   |
|                            | Choline                                             | Lipid                 | Phospholipid Metabolism                              | 0.131382677   |
|                            | 5alpha-androstan-3beta,17alpha-diol disulfate       | Lipid                 | Steroid                                              | 0.222502942   |
|                            | 5alpha-androstan-3alpha,17beta-diol monosulfate (2) | Lipid                 | Steroid                                              | 0.099659612   |
|                            | leukotriene B4                                      | Lipid                 | Eicosanoid                                           | 0.178309248   |
|                            | Malonate                                            | Lipid                 | Fatty Acid Synthesis                                 | 0.064994991   |
|                            | adenosine 5'-monophosphate (AMP)                    | Nucleotide            | Purine Metabolism, Adenine containing                | 0.344258294   |
|                            | Adenosine                                           | Nucleotide            | Purine Metabolism, Adenine containing                | 0.205261485   |
|                            | N6-succinyladenosine                                | Nucleotide            | Purine Metabolism, Adenine containing                | 0.199480006   |
|                            | Guanosine                                           | Nucleotide            | Purine Metabolism, Guanine containing                | 0.287798715   |
|                            | inosine 5'-monophosphate (IMP)                      | Nucleotide            | Purine Metabolism, (Hypo)Xanthine/Inosine containing | 0.259437531   |
|                            | Orotate                                             | Nucleotide            | Pyrimidine Metabolism, Orotate containing            | 0.228840762   |
|                            | Orotidine                                           | Nucleotide            | Pyrimidine Metabolism, Orotate containing            | 0.212602335   |
|                            | S-methylcysteine                                    | Amino Acid            | Methionine, Cysteine, SAM and Taurine Metabolism     | 0.297586187   |
|                            | Hypotaurine                                         | Amino Acid            | Methionine, Cysteine, SAM and Taurine Metabolism     | 0.205558503   |
|                            | Aspartate                                           | Amino Acid            | Alanine and Aspartate Metabolism                     | 0.251274305   |
|                            | Anthranilate                                        | Amino Acid            | Tryptophan Metabolism                                | 0.117047705   |
|                            | 4-hydroxyglutamate                                  | Amino Acid            | Glutamate Metabolism                                 | 0.114535281   |
|                            | Maltose                                             | Carbohydrate          | Glycogen Metabolism                                  | 0.261139141   |
|                            | Xylose                                              | Carbohydrate          | Pentose Metabolism                                   | 0.146729377   |
|                            | X – 15486                                           | unknown               | Unknown                                              | 0.330125603   |
|                            | X – 14658                                           | unknown               | Unknown                                              | 0.286466056   |
|                            | X – 12815                                           | unknown               | Unknown                                              | 0.18484338    |
|                            | X – 14626                                           | unknown               | Unknown                                              | 0.167098785   |
|                            | X – 16124                                           | unknown               | Unknown                                              | 0.159882032   |
|                            | X – 24540                                           | unknown               | Unknown                                              | 0.159033657   |
|                            | X – 01911                                           | unknown               | Unknown                                              | 0.141168019   |
|                            | <b>Clustered Metabolite Name</b>                    | <b>Classification</b> | <b>Pathway</b>                                       | <b>Degree</b> |
|                            | 1-stearoyl-2-arachidonoyl-GPC (18:0/20:4)           | Lipid                 | Phospholipid Metabolism                              | 0.435507488   |
|                            | 1-palmitoyl-2-linoleoyl-GPC (16:0/18:2)             | Lipid                 | Phospholipid Metabolism                              | 0.426020776   |
|                            | 1-palmitoyl-2-oleoyl-GPI (16:0/18:1)*               | Lipid                 | Phospholipid Metabolism                              | 0.410196262   |
|                            | 1-palmitoyl-2-linoleoyl-GPE (16:0/18:2)             | Lipid                 | Phospholipid Metabolism                              | 0.354602072   |
|                            | 1-palmitoyl-2-oleoyl-GPC (16:0/18:1)                | Lipid                 | Phospholipid Metabolism                              | 0.284882098   |
|                            | 1-stearoyl-2-arachidonoyl-GPE (18:0/20:4)           | Lipid                 | Phospholipid Metabolism                              | 0.259855236   |
|                            | 1-palmitoyl-GPA (16:0)                              | Lipid                 | Lysolipid                                            | 0.491730565   |
|                            | 1-oleoyl-GPI (18:1)*                                | Lipid                 | Lysolipid                                            | 0.477106725   |
|                            | 1-palmitoyl-GPG (16:0)*                             | Lipid                 | Lysolipid                                            | 0.476366627   |
|                            | 1-arachidonoyl-GPE (20:4n6)*                        | Lipid                 | Lysolipid                                            | 0.374548776   |
|                            | 1-oleoyl-GPE (18:1)                                 | Lipid                 | Lysolipid                                            | 0.34871557    |

|                                                  |              |                                                  |             |
|--------------------------------------------------|--------------|--------------------------------------------------|-------------|
| <b>1-arachidonoyl-GPI (20:4)*</b>                | Lipid        | Lysolipid                                        | 0.218519576 |
| <b>2-palmitoylglycerol (16:0)</b>                | Lipid        | Monoacylglycerol                                 | 0.369694925 |
| <b>1-palmitoylglycerol (16:0)</b>                | Lipid        | Monoacylglycerol                                 | 0.244802209 |
| <b>1-oleoyl-3-linoleoyl-glycerol (18:1/18:2)</b> | Lipid        | Diacylglycerol                                   | 0.440218274 |
| <b>10-undecenoate (11:1n1)</b>                   | Lipid        | Medium Chain Fatty Acid                          | 0.280975373 |
| <b>N-acetyltyrosine</b>                          | Amino Acid   | Phenylalanine and Tyrosine Metabolism            | 0.269064849 |
| <b>dopamine sulfate (2)</b>                      | Amino Acid   | Phenylalanine and Tyrosine Metabolism            | 0.177584345 |
| <b>1-methylhistidine</b>                         | Amino Acid   | Histidine Metabolism                             | 0.427924467 |
| <b>2-hydroxybutyrate/2-hydroxyisobutyrate</b>    | Amino Acid   | Methionine, Cysteine, SAM and Taurine Metabolism | 0.220083479 |
| <b>betaine</b>                                   | Amino Acid   | Glycine, Serine and Threonine Metabolism         | 0.159774895 |
| <b>ribitol</b>                                   | Carbohydrate | Pentose Metabolism                               | 0.250111883 |
| <b>N-acetylglucosamine/N-acetylgalactosamine</b> | Carbohydrate | Aminosugar Metabolism                            | 0.206158734 |
| <b>galactonate</b>                               | Carbohydrate | Fructose, Mannose and Galactose Metabolism       | 0.168680637 |
| <b>X - 23293</b>                                 | unknown      | Unknown                                          | 0.238174521 |
| <b>X - 23662</b>                                 | unknown      | Unknown                                          | 0.174205718 |
| <b>X - 23765</b>                                 | unknown      | Unknown                                          | 0.168330145 |

Degree is the average of the values of correlations for the given metabolite in the cluster to other metabolites within that cluster. Abbreviations: TCA, tricarboxylic acid cycle.

**Table S8.** List of top metabolic pathways enriched in the pathway analysis.

| Pathway                                            | Total Number of Metabolites | Expected Hits | Observed Hits | P-value  | FDR    |
|----------------------------------------------------|-----------------------------|---------------|---------------|----------|--------|
| <b>Sphingolipid metabolism</b>                     | 21                          | 0.511         | 5             | 9.88E-05 | 0.0083 |
| <b>Purine metabolism</b>                           | 65                          | 1.58          | 5             | 0.0184   | 0.772  |
| <b>Glycerophospholipid metabolism</b>              | 36                          | 0.875         | 3             | 0.0544   | 1      |
| <b>Pentose and glucuronate interconversions</b>    | 18                          | 0.438         | 2             | 0.0689   | 1      |
| <b>Phosphonate and phosphinate metabolism</b>      |                             |               |               |          |        |
| <b>Ascorbate and aldarate metabolism</b>           | 8                           | 0.194         | 1             | 0.179    | 1      |
| <b>Taurine and hypotaurine metabolism</b>          | 8                           | 0.194         | 1             | 0.179    | 1      |
| <b>Glycine, serine and threonine metabolism</b>    | 33                          | 0.802         | 2             | 0.19     | 1      |
| <b>Arginine biosynthesis</b>                       | 14                          | 0.34          | 1             | 0.293    | 1      |
| <b>Nicotinate and nicotinamide metabolism</b>      | 15                          | 0.365         | 1             | 0.31     | 1      |
| <b>Fatty acid biosynthesis</b>                     | 47                          | 1.14          | 2             | 0.318    | 1      |
| <b>Histidine metabolism</b>                        | 16                          | 0.389         | 1             | 0.327    | 1      |
| <b>Starch and sucrose metabolism</b>               | 18                          | 0.438         | 1             | 0.36     | 1      |
| <b>Pantothenate and CoA biosynthesis</b>           | 19                          | 0.462         | 1             | 0.375    | 1      |
| <b>beta-Alanine metabolism</b>                     | 21                          | 0.511         | 1             | 0.406    | 1      |
| <b>Alanine, aspartate and glutamate metabolism</b> | 28                          | 0.681         | 1             | 0.501    | 1      |
| <b>Inositol phosphate metabolism</b>               | 30                          | 0.729         | 1             | 0.526    | 1      |
| <b>Arachidonic acid metabolism</b>                 | 36                          | 0.875         | 1             | 0.592    | 1      |
| <b>Pyrimidine metabolism</b>                       | 39                          | 0.948         | 1             | 0.622    | 1      |
| <b>Tryptophan metabolism</b>                       | 41                          | 0.997         | 1             | 0.64     | 1      |
| <b>Aminoacyl-tRNA biosynthesis</b>                 | 48                          | 1.17          | 1             | 0.699    | 1      |

Abbreviations: FDR, false discovery rate.

## References:

1. Johnson, J.A.; Boerwinkle, E.; Zineh, I.; Chapman, A.B.; Bailey, K.; Cooper-DeHoff, R.M.; Gums, J.; Curry, R.W.; Gong, Y.; Beitelshes, A.L.; et al. Pharmacogenomics of antihypertensive drugs: rationale and design of the Pharmacogenomic Evaluation of Antihypertensive Responses (PEAR) study. *Am Heart J* **2009**, *157*, 442-449, doi:10.1016/j.ahj.2008.11.018.
2. Mehanna, M.; Gong, Y.; McDonough, C.W.; Beitelshes, A.L.; Gums, J.G.; Chapman, A.B.; Schwartz, G.L.; Johnson, J.A.; Turner, S.T.; Cooper-DeHoff, R.M. Blood pressure response to metoprolol and chlorthalidone in European and African Americans with hypertension. *J Clin Hypertens (Greenwich)* **2017**, *19*, 1301-1308, doi:10.1111/jch.13094.
3. Evans, A.M.; Br, B.; Liu, Q.; Mitchell, M.W.; Rj, R.; Dai, H.; Sj, S.; DeHaven, C.D.; Lad, M. High Resolution Mass Spectrometry Improves Data Quantity and Quality as Compared to Unit Mass Resolution Mass Spectrometry in High- Throughput Profiling Metabolomics. *Metabolomics* **2014**, *4*, 1-3.
4. Xia, J.; Sinelnikov, I.V.; Han, B.; Wishart, D.S. MetaboAnalyst 3.0--making metabolomics more meaningful. *Nucleic Acids Res* **2015**, *43*, W251-257, doi:10.1093/nar/gkv380.
5. Afgan, E.; Baker, D.; Batut, B.; van den Beek, M.; Bouvier, D.; Cech, M.; Chilton, J.; Clements, D.; Coraor, N.; Grüning, B.A.; et al. The Galaxy platform for accessible, reproducible and collaborative biomedical analyses: 2018 update. *Nucleic Acids Res* **2018**, *46*, W537-W544, doi:10.1093/nar/gky379.
6. Bland, J.M.; Altman, D.G. Statistical methods for assessing agreement between two methods of clinical measurement. *Lancet* **1986**, *1*, 307-310.
